# Supplementary material for: Highly flexible, transparent and conducting CuS-nanosheet networks for flexible quantum-dot solar cells
Source: Royal Society of Chemistry journal article supplement (doi:10.1039/c6nr09916e), 2017-01-01
Supplement: c6nr09916e1.pdf [file c6nr09916e1.pdf]

## Support information

### Highly Flexible, Transparent and Conducting CuS-Nanosheet Networks for Flexible Quantum-Dot Solar Cells

Zijie Xu<sup>a</sup>, Teng Li<sup>a</sup>, Fayin Zhang<sup>a</sup>, Xiaodan Hong<sup>a</sup>, Shuyao Xie<sup>a</sup>, Meidan Ye<sup>a</sup>, Wenxi Guo<sup>\*a</sup>, and Xiangyang Liu<sup>ab</sup>

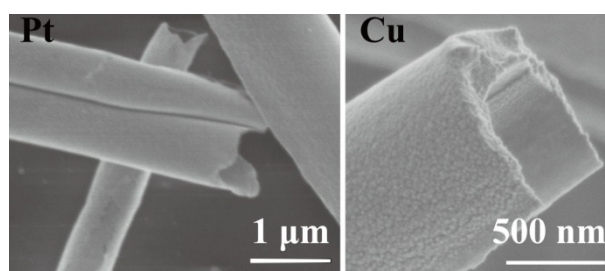

**Figure S1.** SEM images of the sectional view of Pt and Cu nanotrrough.

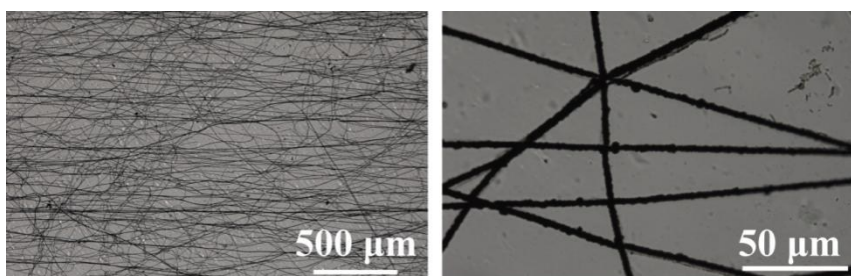

**Figure S2.** SEM images of CuS nanotrrough networks with different magnifications.

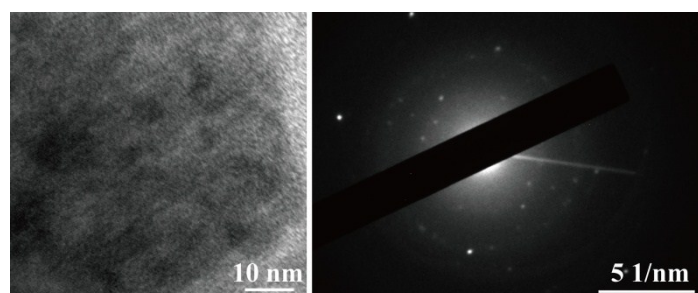

**Figure S3.** TEM and selected-area electron diffraction (SAED) images of sputtered CuS film.

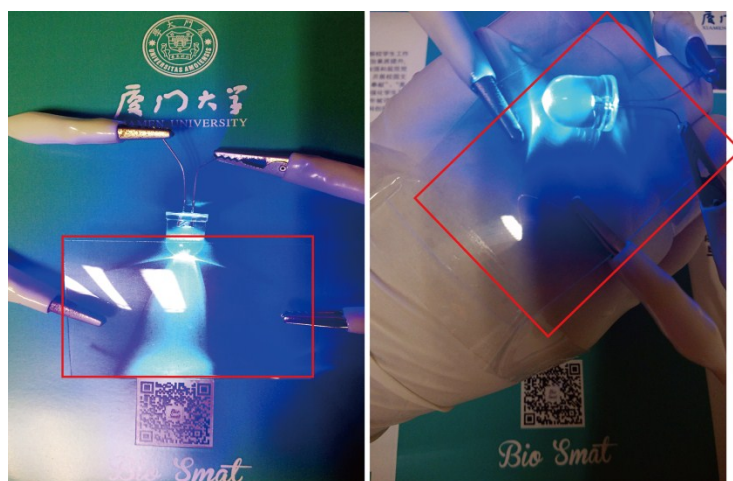

**Figure S4.** The photographs of the CuS NS networks TCE after crushing and unfolding, the CuS NS networks TCE remained conducting.
